# Supplementary material for: Preparation of TiO2–ZrO2/Au/CeO2 hollow sandwich-like nanostructures for excellent catalytic activity and thermal stability
Source: Royal Society of Chemistry journal article supplement (doi:10.1039/c7nj03639f), 2017-01-01
Supplement: c7nj03639f1.pdf [file c7nj03639f1.pdf]

## Supporting Information

### Preparation of $\text{TiO}_2\text{-ZrO}_2/\text{Au}/\text{CeO}_2$ hollow sandwich-like nanostructure

#### for excellent catalytic activity and thermal stability

Mengqiu Huang, Yiwei Zhang\*, Yuming Zhou\*, Chao Zhang, Shuo Zhao, Jiasheng Fang, Yan Gao, Xiaoli Sheng

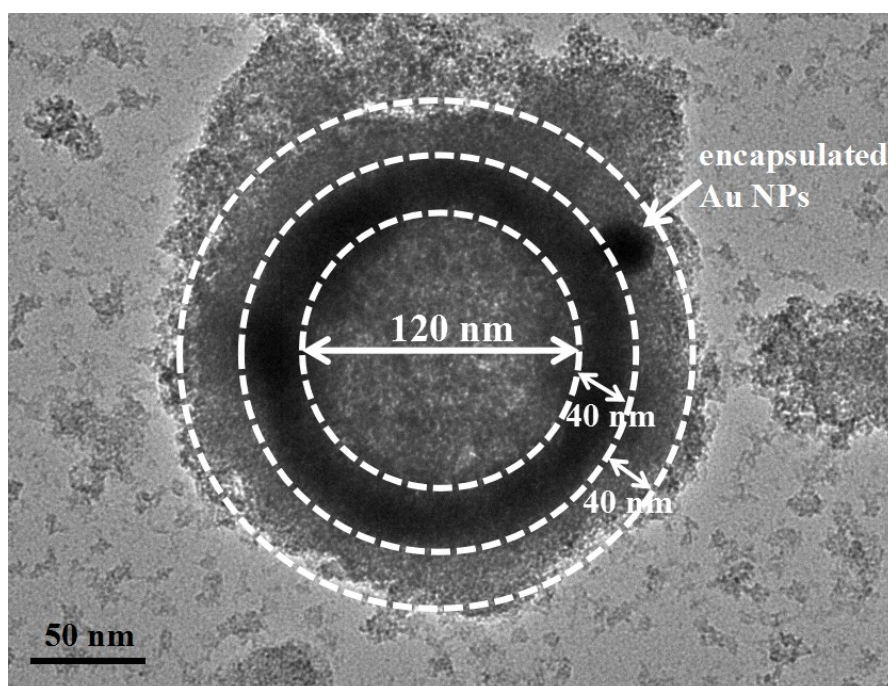

Fig. S1. TEM image of  $\text{TiO}_2\text{-ZrO}_2/\text{Au}/\text{CeO}_2$  sample with sintered Au NPs.

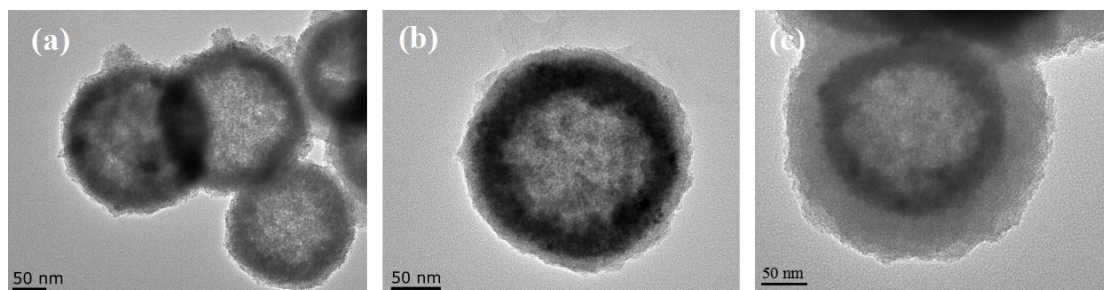

School of Chemistry and Chemical Engineering, Southeast University, Jiangsu Optoelectronic Functional Materials and Engineering Laboratory, Nanjing 211189, China. E-mail: ymzhou@seu.edu.cn; Fax: +86 2552090617; Tel: +86 25 52090617

Fig. S2. TEM images of  $\text{TiO}_2\text{-ZrO}_2/\text{Au}/\text{CeO}_2$  with distinct thickness  $\text{TiO}_2\text{-ZrO}_2$  layer.

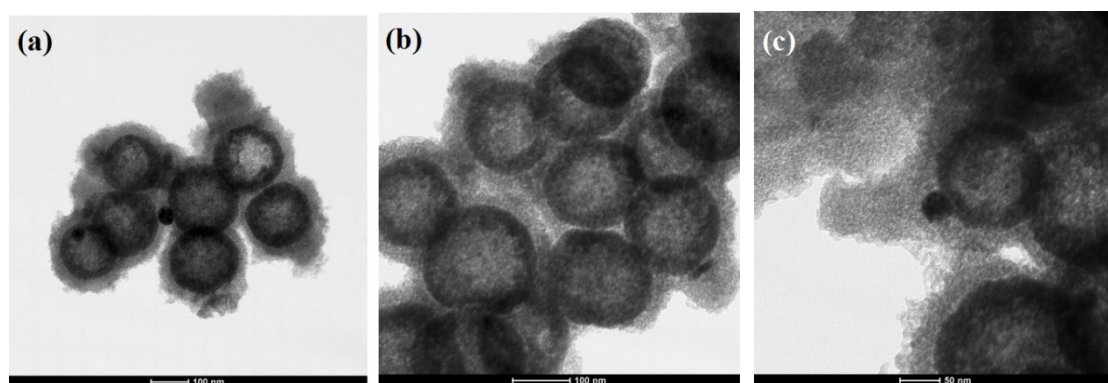

Fig. S3. TEM images of  $\text{TiO}_2\text{-ZrO}_2/\text{Au}/\text{CeO}_2$  with distinct thickness  $\text{TiO}_2\text{-ZrO}_2$  layer after calculation.

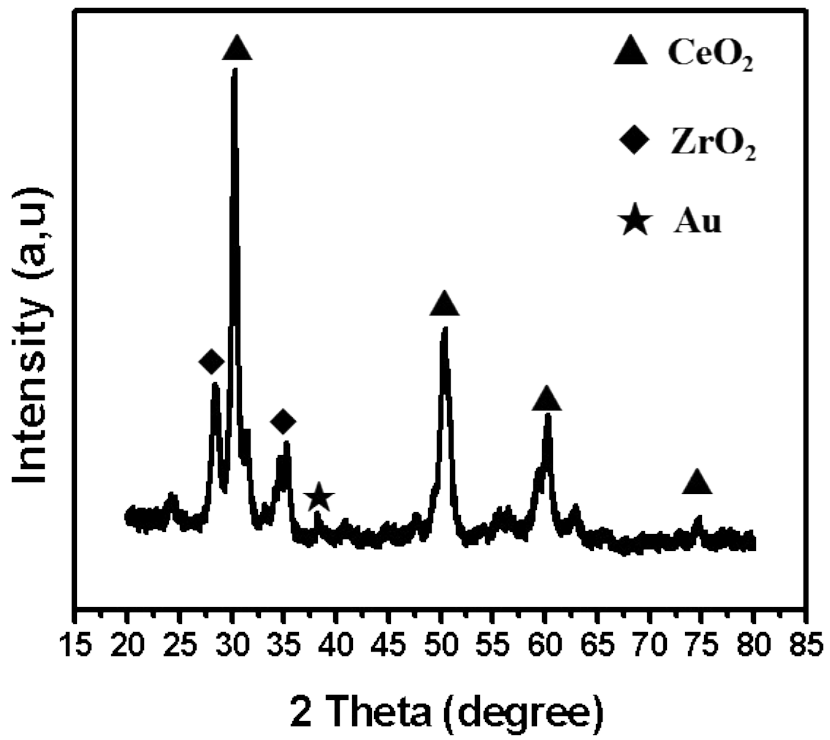

Fig. S4. X-ray diffraction patterns of calcined ZrO<sub>2</sub>/Au/CeO<sub>2</sub> at 1000 °C.

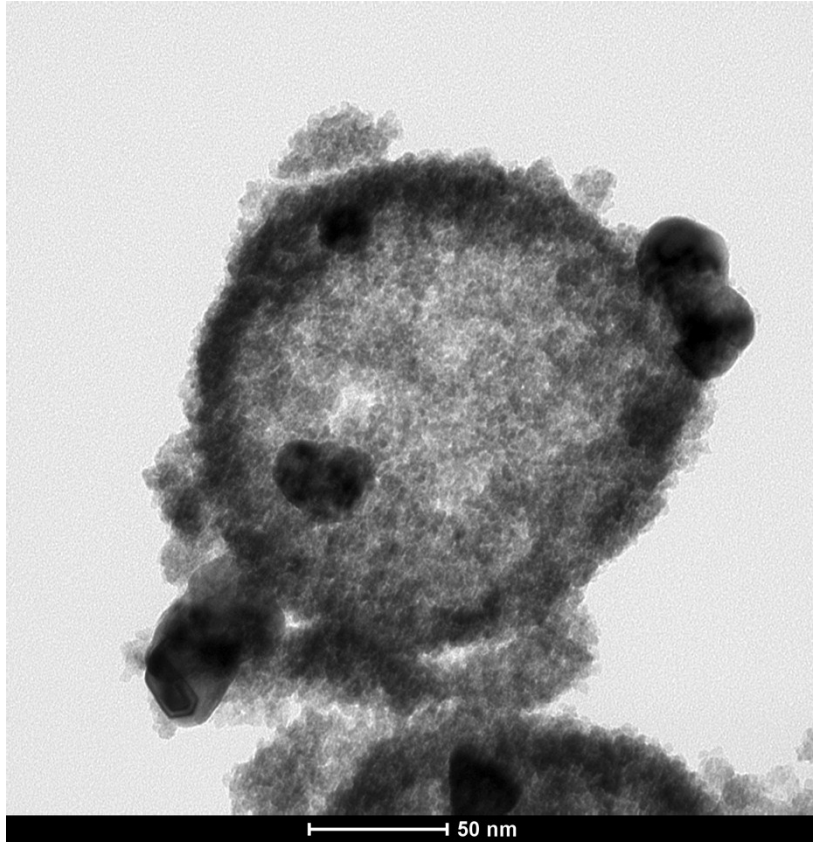

Fig. S5. TEM images of Au/CeO<sub>2</sub> after calcination at 550 °C.

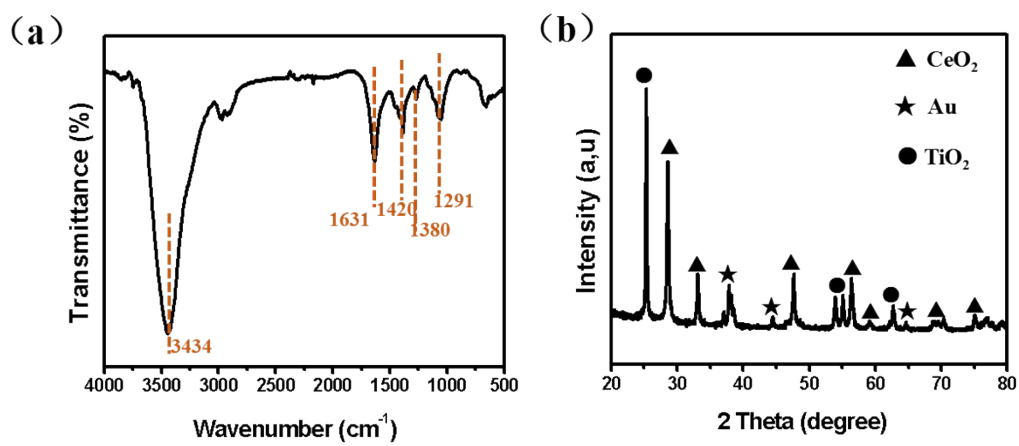

Fig. S6. (a) FTIR patterns and (b) XRD pattern of TiO<sub>2</sub>-ZrO<sub>2</sub>/Au/CeO<sub>2</sub> after reduction of 4-nitrophenol.

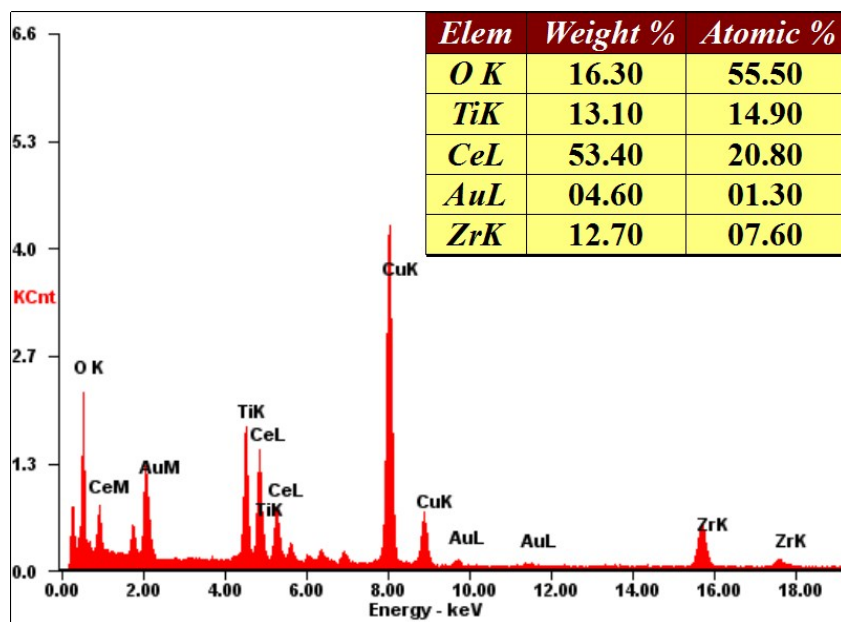

Fig. S7. The EDX analysis of  $\text{TiO}_2\text{-ZrO}_2/\text{Au}/\text{CeO}_2$  after reduction of 4-nitrophenol.
